# Supplementary material for: Visible Light-Driven p-Type Semiconductor Gas Sensors Based on CaFe2O4 Nanoparticles
Source: PubMed Central journal article supplement (PMC7038740; doi:10.3390/s20030850), 2020-02-05
Supplement: sensors-20-00850-s001.pdf [file sensors-20-00850-s001.pdf]

## Supplementary Information

# Visible Light-Driven *p*-Type Semiconductor Gas Sensors Based on $\text{CaFe}_2\text{O}_4$ Nanoparticles <sup>†</sup>

Qomaruddin <sup>1,2,3,\*</sup>, Olga Casals <sup>1</sup>, Andris Šutka <sup>4</sup>, Tony Granz <sup>2</sup>, Andreas Waag <sup>2</sup>,  
Hutomo Suryo Wasisto <sup>2</sup>, Joan Daniel Prades <sup>1,\*</sup> and Cristian Fàbrega <sup>1,\*</sup>

- <sup>1</sup> MIND-IN2UB, Department of Electronic and Biomedical Engineering, Universitat de Barcelona, Barcelona 08028, Spain; ocasals@el.uab.edu (O.C.)
  - <sup>2</sup> Institute of Semiconductor Technology (IHT) and Laboratory for Emerging Nanometrology (LENA), Technische Universität Braunschweig, Braunschweig 38106, Germany; t.granz@tu-braunschweig.de (T.G.); a.waag@tu-braunschweig.de (A.W.); h.wasisto@tu-braunschweig.de (H.S.W.)
  - <sup>3</sup> Research Center for Physics, Indonesian Institute of Sciences (LIPI), Tangerang Selatan 15314, Indonesia
  - <sup>4</sup> Research Laboratory of Functional Materials Technologies, Faculty of Materials Science and Applied Chemistry, Riga Technical University, Riga 1048, Latvia; andris.sutka@rtu.lv
- \* Correspondence: qomaruddin@el.uab.edu (Q.); cfabrega@el.uab.edu (C.F.); dprades@el.uab.edu (J.D.P.)

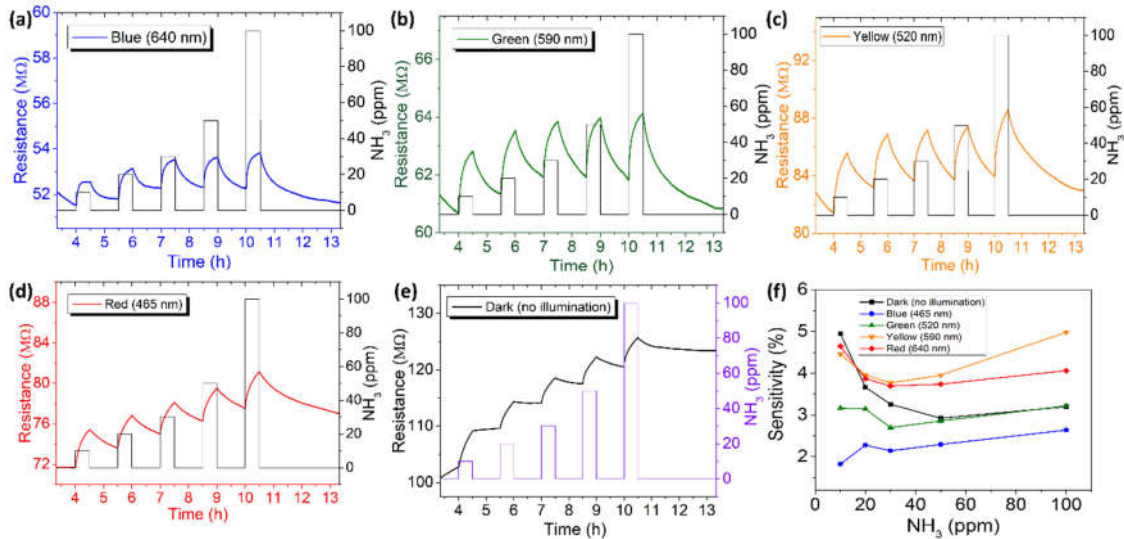

**Figure S1.** Dynamic responses of  $\text{CaFe}_2\text{O}_4$  towards  $\text{NH}_3$  reducing gas in varied vapor concentrations (i.e., 10, 20, 30, 50, and 100 ppm) under light activation from (a) blue (465 nm), (b) green (520 nm), (c) yellow (590 nm), (d) red (640 nm) LEDs and (e) in dark condition (without illumination). (f) Comparison of the sensor sensitivity under visible light exposures and dark condition for  $\text{NH}_3$  sensing.

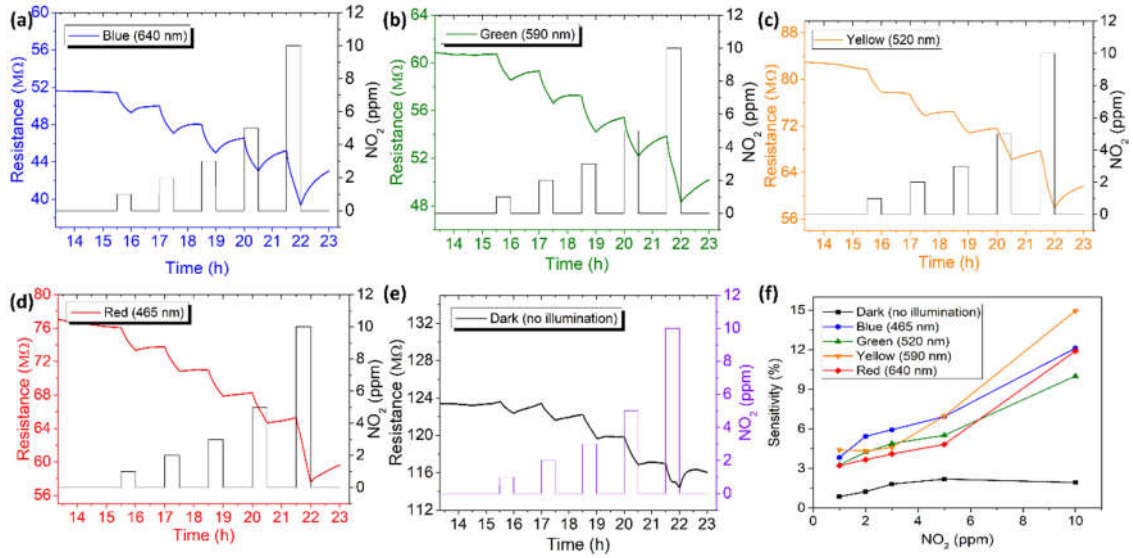

**Figure S2.** Dynamic responses of CaFe<sub>2</sub>O<sub>4</sub> towards NO<sub>2</sub> gas in varied vapor concentrations (i.e. 1, 2, 3, 5, and 10 ppm) under light activation from (a) blue (465 nm), (b) green (520 nm), (c) yellow (590 nm), (d) red (640 nm) LEDs and (e) in dark condition (without illumination). (f) Comparison of the sensor sensitivity under visible light exposures and dark condition for NO<sub>2</sub> sensing.
